# Supplementary material for: Effects of task complexity on the learning of genre specific rhetorical moves and linguistic forms: the case of contrast and argumentative essays
Source: publisher site journal article supplement (doi:10.1515/iral-2021-0111), 2021-07-08
Supplement: Supplementary file 1 [file j_iral-2021-0111_suppl.docx]

Appendix A

Collaborative Writing Task for Argumentative Essay (Simple Version)

An argumentative essay is a type of writing that requires a writer to defend a position on a topic using evidence substantiated by facts, experience, literature, historical examples, expert quotes and research. The writer’s main aim is to get the reader to accept his or her perspective, and the writer usually uses several different arguments to prove his or her point.

One basic pattern of organization for developing an argumentative essay is the Point-by-Point Refutation. In this pattern, each paragraph summarizes the opposing view (i.e., one of the opponent’s arguments) and is followed by a refutation of that opposing view (i.e., the writer’s argument). This pattern of organization requires that you discuss one of your opponent’s arguments and your arguments to prove your opponent wrong in each body paragraph.

There are also certain expressions that are used in argumentative essays to (a) acknowledge and accommodate opposing viewpoints, (b) refute opposing viewpoints, and (c) propose a specific argument and offer reasons, evidence, explanations, and examples to support the argument. You will learn those expressions in this task.

Your task is to write an **argumentative essay** on the following topic:

**Some students believe that CMU should provide more ethnic food options (e.g., Chinese, Italian, Greek, Mexican, Japanese, Korean, etc.). On the contrary, others argue that CMU already provides enough food options and no more food varieties are needed. What is your position on the subject?**

You will have **60 minutes** to complete your task. You will complete this task with a classmate. You will each have 3 minutes for individual planning before you start collaborating with your classmate. When you complete this task, make sure you discuss the structure of the argumentative essay as well as the expressions that are generally used in these essays. You are not allowed to refer to textbooks, notes or dictionaries.

Below, you will find:

(1) a T-chart that will give you some ideas to include in your essay,

(2) an outline that will help you organize your essay, and

(3) a list of expressions that you should use when writing your argumentative essay.

**(1)T-chart: Some arguments and opposing viewpoints to include in your argumentative essay.**

| **Students who believe that the CMU should provide more ethnic food options argue that…** | **Students who believe that CMU should not provide more food options argue that…** |
| --- | --- |
| Offering a variety of food options can accommodate cultural, ethnic, and personal preferences.  International students prefer to eat their traditional cuisine to overcome homesickness or to remember and share their original culture.  The availability of ethnic food options promotes openness to new cultures.  The availability of ethnic food options is a relevant variable in the overall college experience of international students. | There are plenty of ethnic restaurants a few blocks away from  the university’s campus that international students can go to in order to satisfy their preferences.  International students should get used to the food items of the country where they are pursuing their college degree.  Interacting with students from different nationalities is enough to promote openness to new cultures.  Offering food options that accommodate the preferences of international students is not a top priority of the University.  Offering high quality education is the priority. |

1. **Outline**

|  | Point-by-Point Refutation |
| --- | --- |
| Introduction | - Introduction to the general topic (you can provide general information about the topic, explaining the situation so that the reader can make sense of the topic and the claims you make). - State why the topic is important (tell the reader why he or she should care and keep reading. Your goal is to create a compelling, clear, and convincing essay people will want to read and act upon). - **Thesis statement** = compose a sentence or two stating the position you will support with sound reasoning and author credibility. |
| Body Paragraph 1 | **Short summary of your opponent’s first argument, followed by your refutation and your argument**  **Opponent’s argument** (Refer to the ideas provided in the T-chart):  ___________________________________________________________________________  **Your refutation:** make clear the nature of your disagreement with the argument or position you are refuting. For example, you might want to state that your opponent’s argument is not convincing because he or she has provided evidence that is outdated, or that the argument is filled with misleading and faulty arguments.  **Your position with explanation and support**   - Provide evidence to support your argument #1. Refer to the ideas provided in the T-chart. |
| Body Paragraph 2 | **Short summary of your opponent’s second argument, followed by your refutation and your argument**  **Opponent’s argument** (Refer to the ideas provided in the T-chart):  ____________________________________________________________________________  **Your refutation:** make clear the nature of your disagreement with the argument or position you are refuting. For example, you might want to state that your opponent’s argument is not convincing because he or she has provided evidence that is outdated, or that the argument is filled with misleading and faulty arguments.  **Your position with explanation and support**   - Provide evidence to support your argument #2. Refer to the ideas provided in the T-chart. |
| Conclusion | - Restate your topic and why it is important. - Restate your thesis/claim. - Address opposing viewpoints and explain why readers should align with your position. - Demand action, suggest a solution or predict an outcome.   Remember: **Your conclusion cannot be a one-sentence paragraph**. Aim at writing at least three to four sentences. |

| **Acknowledging and accommodating opposing viewpoints** | **Refuting your opponent’s viewpoints** | **Proposing a specific argument** |
| --- | --- | --- |
| - Opponents of… maintain that *[state the opposing viewpoint here]* - Those who are against…may assert that *[state the opposing viewpoint here]* - Many peoplebelieve that *[state the opposing viewpoint here]* - It is often thought that *[state the opposing viewpoint here]* | - This view is mistaken because it overlooks… - This view fails to acknowledge that… - The claim that *[state the opposing viewpoint here]* rests upon the questionable assumption that… - This view sounds convincing at first, but... - While this position is popular, it is not supported by the facts | - The main advantage/disadvantage of ... - An additional advantage/disadvantage of, - One argument in favor of/against… - Adding to my argument, I would point out that… |

(3) List of expressions to (a) acknowledge and accommodate opposing viewpoints, (b) refute opposing viewpoints, and (c) propose a specific argument and offer reasons, evidence, explanations, and examples to support the argument. Make sure you include these expressions when you write your argumentative essay.

Appendix B

Collaborative Writing Task for Argumentative Essay (Complex Version)

An argumentative essay is a type of writing that requires a writer to defend a position on a topic using evidence substantiated by facts, experience, literature, historical examples, expert quotes and research. The writer’s main aim is to get the reader to accept his or her perspective, and the writer usually uses several different arguments to prove his or her point.

One basic pattern of organization for developing an argumentative essay is the Point-by-Point Refutation. In this pattern, each paragraph summarizes the opposing view (i.e., one of the opponent’s arguments) and is followed by a refutation of that opposing view (i.e., the writer’s argument). This pattern of organization requires that you discuss one of your opponent’s arguments and your arguments to prove your opponent wrong in each body paragraph.

There are also certain expressions that are used in argumentative essays to (a) acknowledge and accommodate opposing viewpoints, (b) refute opposing viewpoints, and (c) propose a specific argument and offer reasons, evidence, explanations, and examples to support the argument. You will learn those expressions in this task.

Your task is to write an **argumentative essay** on the following topic:

**Some students believe that CMU should provide more ethnic food options (e.g., Chinese, Italian, Greek, Mexican, Japanese, Korean, etc.). On the contrary, others argue that CMU already provides enough food options and no more food varieties are needed. What is your position on the subject?**

You will have **60 minutes** to complete your task. You will complete this task with a classmate. You will each have 3 minutes for individual planning before you start collaborating with your classmate. When you complete this task, make sure you discuss the structure of the argumentative essay as well as the expressions that are generally used in these essays. You are not allowed to refer to textbooks, notes or dictionaries.

Below, you will find:

(1) a T-chart with arguments and counterarguments that you can include in your essay. The arguments that are related to specific counterarguments, however, are **not presented next to each other**. When you write your essay, **you will need to re-arrange the ideas** in a way that helps the reader understand the connection between the arguments and counterarguments,

(2) an outline that **does not** follow the structure of an argumentative essay. With your classmate, you will need to discuss how the outline should be re-arranged so that it follows the Point-by-Point pattern organization,

(3) a list of expressions that can be used when writing argumentative essays. You will need to decide which expressions you should use to (a) acknowledge and accommodate opposing viewpoints, (b) refute opposing viewpoints, and (c) propose a specific argument. Make sure you use the appropriate expressions in the appropriate place!

1. **T-chart: Some arguments and opposing viewpoints to include in your argumentative essay (**Remember that the arguments that are related to specific counterarguments are **not presented next to each other**. When you write your essay, **you will need to re-arrange the ideas** in a way that helps the reader understand the connection between the arguments and counterarguments).

| **Students who believe that the CMU should provide more ethnic food options argue that…** | **Students who believe that CMU should not provide more food options argue that…** |
| --- | --- |
| Offering a variety of food options can accommodate cultural, ethnic, and personal preferences.  International students prefer to eat their traditional cuisine to overcome homesickness or to remember and share their original culture.  The availability of ethnic food options promotes openness to new cultures.  The availability of ethnic food options is a relevant variable in the overall college experience of international students. | International students should get used to the food items of the country where they are pursuing their college degree.  Interacting with students from different nationalities is  enough to promote openness to new cultures.  There are plenty of ethnic restaurants a few blocks away from the university’s campus that international students can go to in order to satisfy their preferences.  Offering food options that accommodate the preferences of international students is not a top priority of the University. Offering high quality education is the priority. |

1. **Outline**

(Discuss with your classmate how to re-arrange the outline so it follows the Point-by-Point refutation pattern. When you discuss with your classmate, do not refer to the different paragraphs as “paragraph 1,” “paragraph 2,” “paragraph 3,” and “paragraph 4.” Refer to them in terms of their function (e.g., introducing the topic).

|  | Point-by-Point Refutation |
| --- | --- |
| Function of this paragraph:  _______________ | **Short summary of your opponent’s argument, followed by your refutation and your argument**  **Opponent’s argument** (Refer to the ideas provided in the T-chart): _______________________________________________________________  **Your refutation:** make clear the nature of your disagreement with the argument or position you are refuting. For example, you might want to state that your opponent’s argument is not convincing because he or she has provided evidence that is outdated, or that the argument is filled misleading and faulty arguments.  **Your position with explanation and support**   - Provide evidence to support your argument. Refer to the ideas provided in the T-chart. |
| Function of this paragraph:  _______________ | - Restate your topic and why it is important. - Restate your thesis/claim. - Address opposing viewpoints and explain why readers should align with your position. - Demand action, suggest a solution or predict an outcome. |
| Function of this paragraph:  _______________ | **Short summary of your opponent’s argument, followed by your refutation and your argument**  **Opponent’s argument** (Refer to the ideas provided in the T-chart): _______________________________________________________________  **Your refutation:** make clear the nature of your disagreement with the argument or position you are refuting. For example, you might want to state that your opponent’s argument is not convincing because he or she has provided evidence that is outdated, or that the argument is filled with misleading and faulty arguments.  **Your position with explanation and support**   - Provide evidence to support your argument. Refer to the ideas provided in the T-chart. |
| Function of this paragraph:  _______________ | - Introduction to the general topic (you can provide general information about the topic, explaining the situation so that the reader can make sense of the topic and the claims you make). - State why the topic is important (tell the reader why he or she should care and keep reading. Your goal is to create a compelling, clear, and convincing essay people will want to read and act upon). - **Thesis statement** = compose a sentence or two stating the position you will support with sound reasoning and author credibility. |

Remember: **Your conclusion cannot be a one-sentence paragraph**. Aim at writing at least three to four sentences.

**(3)** This is a list of expressions used to (a) acknowledge and accommodate opposing viewpoints, (b) refute opposing viewpoints, and (c) propose a specific argument and offer reasons/evidence/explanations/examples to support the argument. With your classmate, discuss which expressions perform which function. Make sure you include these expressions when you write your argumentative essay!

- This view fails to acknowledge that…
- An additional advantage/disadvantage of…
- Many peoplebelieve that *[state the opposing viewpoint here]*
- This view sounds convincing at first, but...
- It is often thought that *[state the opposing viewpoint here]*
- The main advantage/disadvantage of ...
- Opponents of…maintain that *[state the opposing viewpoint here]*
- Adding to my argument, I would point out that…
- This view is mistaken because it overlooks…
- One argument in favor of/against…
- The claim that *[state the opposing viewpoint here]* rests upon the questionable assumption that…
- While this position is popular, it is not supported by the facts
- Those who are against…may assert that *[state the opposing viewpoint here]*

| **Acknowledging and accommodating opposing viewpoints** | **Refuting your opponent’s viewpoints** | **Proposing a specific argument** |
| --- | --- | --- |
|  |  |  |
